# Supplementary material for: Opioid-Induced Constipation in Patients with Cancer Pain in Japan (OIC-J Study): A Post Hoc Analysis
Source: MDPI journal article supplement (doi:10.3390/jcm10184193), 2021-09-16
Supplement: s1 [file s1]

**Supplementary Table S1.** OIC Diagnostic Criteria Used in This Study  
Based on the Rome IV Diagnostic Criteria; available via link from the  
published article online.

| <b>A condition is assessed as OIC when 2 or more of the following are met:</b> |                                                                                  |
|--------------------------------------------------------------------------------|----------------------------------------------------------------------------------|
| 1                                                                              | Straining during more than 25% of defecations                                    |
| 2                                                                              | Lumpy or hard stools (Bristol Stool Form scale 1–2) more than 25% of defecations |
| 3                                                                              | Sensation of incomplete evacuation more than 25% of defecations                  |
| 4                                                                              | Sensation of anorectal obstruction/blockage more than 25% of defecations         |
| 5                                                                              | Fewer than 3 spontaneous bowel movements per week                                |

OIC, opioid-induced constipation.

Information from Lacy et al. *Gastroenterology*. 2016;150:1393-1407.

**Supplementary Table S2.** Summary of opioid regimens during the study.

| <b>Parameter</b>                       | <b>FAS 1<br/>(n = 212)</b> | <b>FAS 2<br/>(n = 208)</b> |
|----------------------------------------|----------------------------|----------------------------|
| Prescribed opioids , n (%)             |                            |                            |
| Regular use                            | 193 (91)                   | 189 (91)                   |
| Oxycodone                              | 150 (71)                   | 148 (71)                   |
| Morphine                               | 16 (8)                     | 14 (7)                     |
| Fentanyl                               | 15 (7)                     | 14 (7)                     |
| Tapentadol                             | 10 (5)                     | 10 (5)                     |
| Hydromorphone                          | 13 (6)                     | 13 (6)                     |
| Rescue use                             | 152 (72)                   | 148 (71)                   |
| Oxycodone                              | 118 (56)                   | 116 (56)                   |
| Morphine                               | 24 (11)                    | 22 (11)                    |
| Fentanyl                               | 2 (1)                      | 2 (1)                      |
| Hydromorphone                          | 9 (4)                      | 9 (4)                      |
| Mean doses <sup>1)</sup> , mg/day (SD) |                            |                            |
| Overall                                | 22 (15)                    | 22 (15)                    |
| Regular use                            | 19 (12)                    | 20 (12)                    |
| Rescue use                             | 6 (6)                      | 6 (6)                      |
| Route, n (%)                           |                            |                            |

|             |          |          |
|-------------|----------|----------|
| Oral        | 203 (96) | 199 (96) |
| Injection   | 17 (8)   | 15 (7)   |
| Transdermal | 16 (8)   | 15 (7)   |
| Others      | 3 (1)    | 3 (1)    |

Daily morphine equivalent dose per patient, FAS: full analysis set,  
SD: standard deviation
